# Supplementary material for: A Simple and Cost-Efficient Platform for a Novel Porcine Circovirus Type 2d (PCV2d) Vaccine Manufacturing
Source: MDPI journal article supplement (doi:10.3390/vaccines11010169), 2023-01-12
Supplement: s1 [file s1]

## Supplementary materials

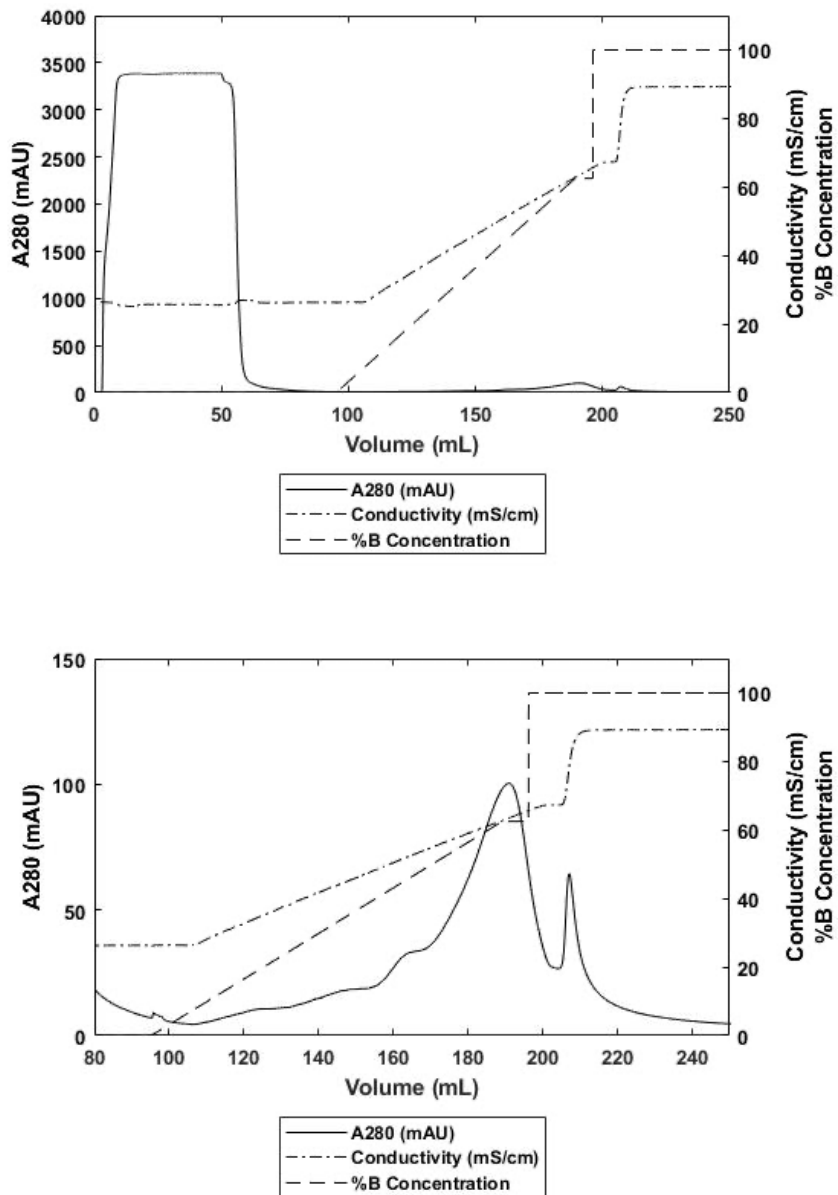

**Figure S1.** Overview chromatogram of PCV2 purification (top), and washing step with salt gradient chromatogram (bottom) where NaCl was varied from 200 to 700 mM in Tris-HCl buffer.

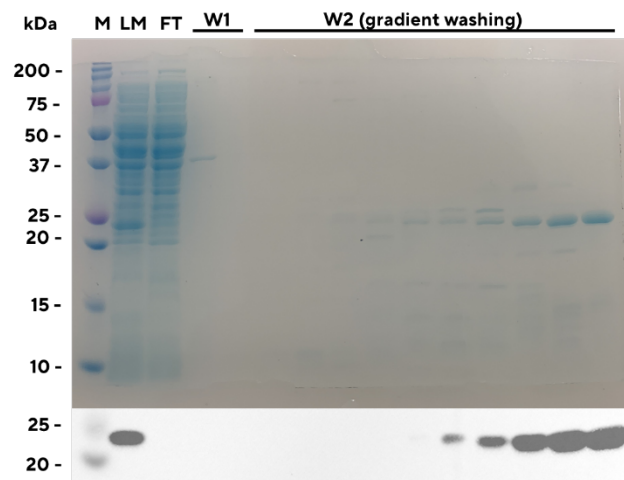

**Figure S2.** SDS-PAGE and western blot results of gradient washing step using salt concentration 200 to 700 mM NaCl in Tris-HCl buffer.

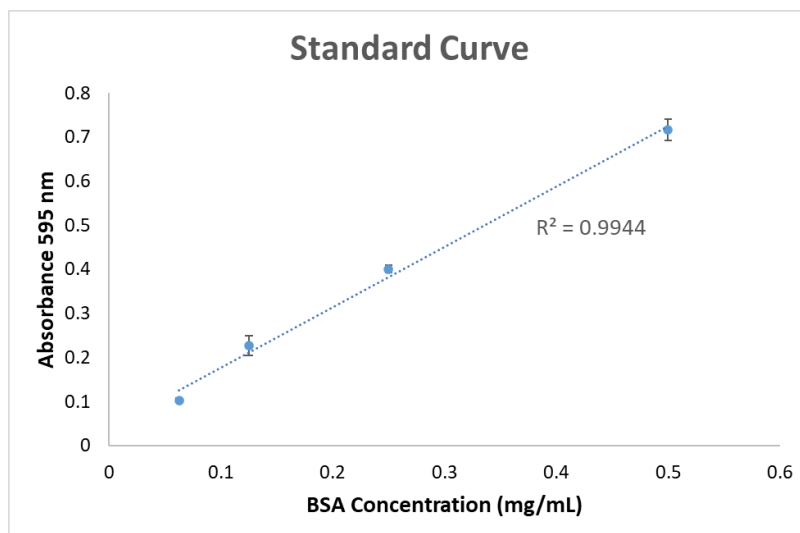

### Protein Concentration

| Fraction | Concentration (mg/mL) |
|----------|-----------------------|
| E1       | 2.09                  |
| E2       | 7.11                  |
| E3       | 2.75                  |
| E4       | 1.36                  |
| E5       | 1.21                  |
| E6       | 0.85                  |
| E7       | 0.65                  |
| E8       | 1.00                  |
| E9       | 1.00                  |
| E10      | 0.98                  |
| E11      | 0.96                  |
| E12      | 0.82                  |
| E13      | 1.02                  |

**Figure S3.** Standard curve (left) and protein concentration (right) of elution fractions from HiScale SP Sepharose Fast Flow.
